# Supplementary material
Source: PubMed Central journal article supplement (PMC1600003)

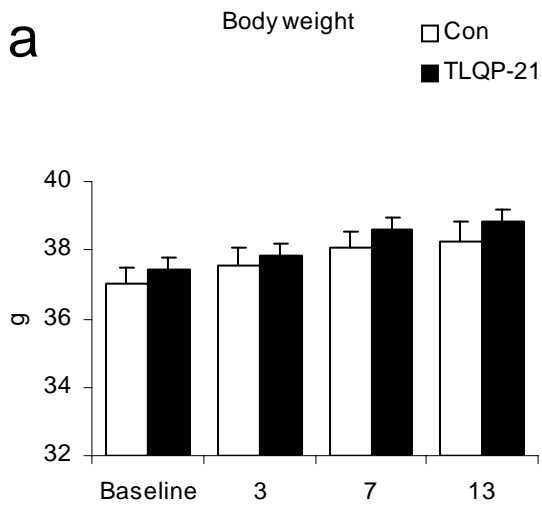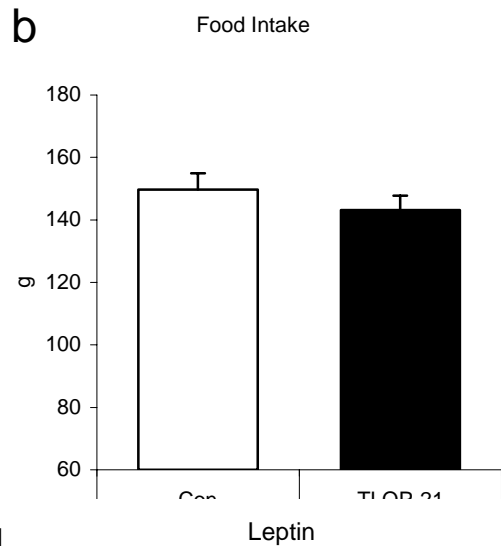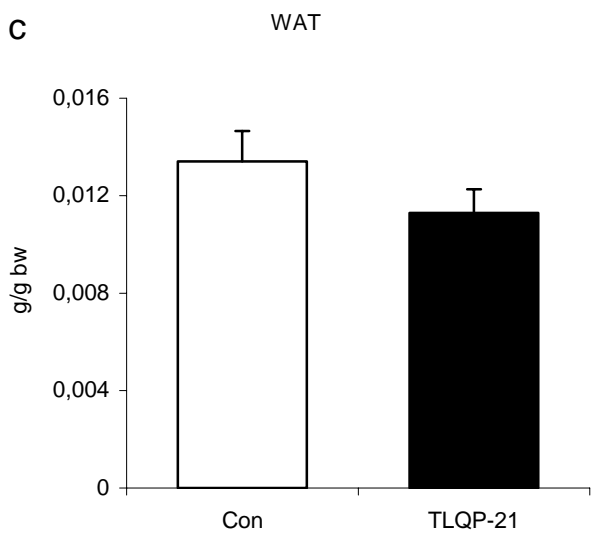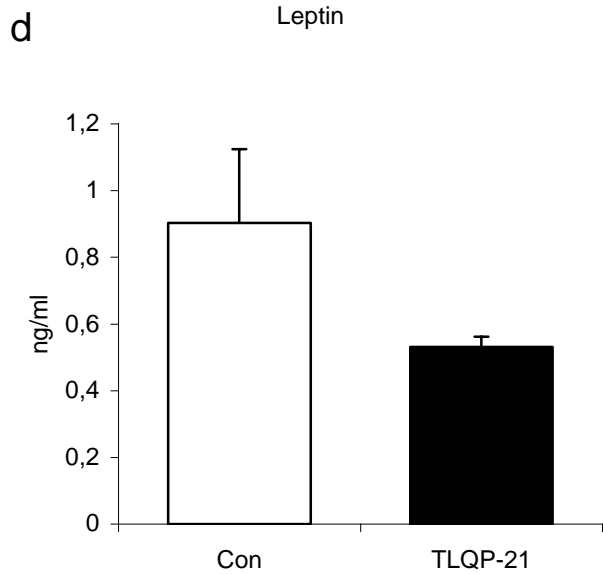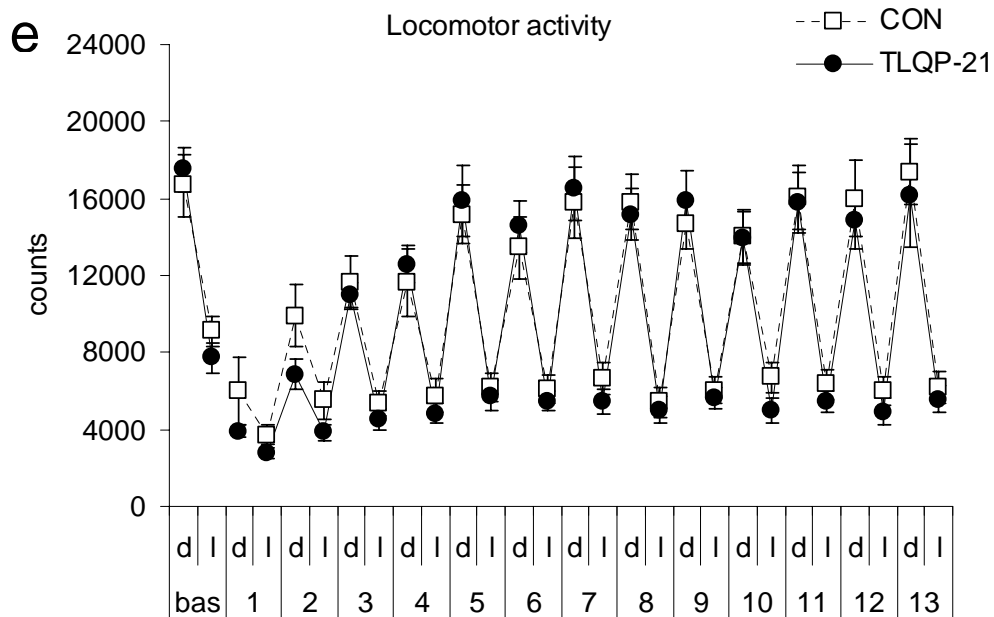

Supplement: pnas_0606102103_1.pdf [file pnas_0606102103_1.pdf]

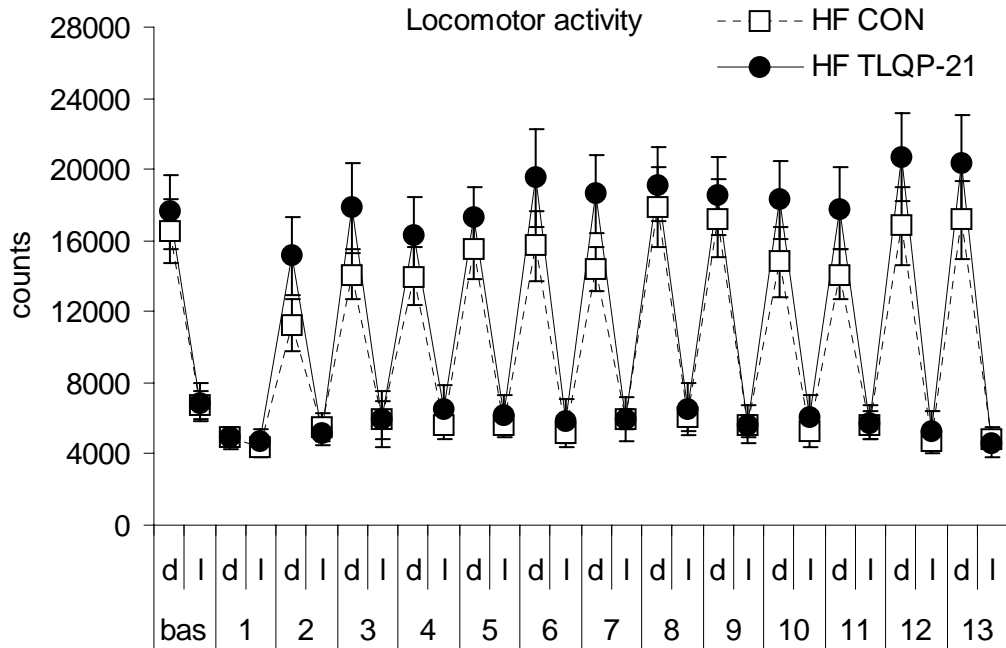

Supplement: pnas_0606102103_2.pdf [file pnas_0606102103_2.pdf]
